# Supplementary material
Source: MDPI journal article supplement (https://www.mdpi.com/2071-1050/10/5/1559)
Supplement: s1 [file s1]

## Supplementary Material: MANOVA results

Table S1: Multivariate result – three-independent variables interaction

| Multivariate Tests <sup>a</sup> |       |                       |               |          |      |                   |
|---------------------------------|-------|-----------------------|---------------|----------|------|-------------------|
| Effect                          | Value | F                     | Hypothesis df | Error df | Sig. | Partial $\eta^2$  |
| Demand *                        |       |                       |               |          |      |                   |
| Lifetime *                      | .999  | 1353.574 <sup>b</sup> | 27.000        | 46.000   | .000 | .999 <sup>c</sup> |
| Lost sales                      |       |                       |               |          |      |                   |

a. Design: Demand \* Lifetime \* Lost sales

b. Exact statistic

c. Partial  $\eta^2$ : Large effect size

Table S2: Multivariate result – Two-independent variables interaction

| Multivariate Tests <sup>a</sup> |       |                        |               |          |      |                    |
|---------------------------------|-------|------------------------|---------------|----------|------|--------------------|
| Effect                          | Value | F                      | Hypothesis df | Error df | Sig. | Partial $\eta^2$   |
| Demand *                        | 1.000 | 71941.619 <sup>b</sup> | 27.000        | 46.000   | .000 | 1.000 <sup>c</sup> |
| Lifetime                        |       |                        |               |          |      |                    |
| Demand *                        | 1.000 | 63363.439 <sup>b</sup> | 27.000        | 46.000   | .000 | 1.000 <sup>c</sup> |
| Lost sales                      |       |                        |               |          |      |                    |
| Lifetime *                      | 1.000 | 6003.494 <sup>b</sup>  | 27.000        | 46.000   | .000 | 1.000 <sup>c</sup> |
| Lost sales                      |       |                        |               |          |      |                    |

a. Design: Demand \* Lifetime \* Lost sales

b. Exact statistic

c. Partial  $\eta^2$ : Large effect size

Table S3: Multivariate result – Main effect

| Multivariate Tests <sup>a</sup> |       |                          |               |          |      |                    |
|---------------------------------|-------|--------------------------|---------------|----------|------|--------------------|
| Effect                          | Value | F                        | Hypothesis df | Error df | Sig. | Partial $\eta^2$   |
| Demand                          | 1.000 | 4325365.881 <sup>b</sup> | 27.000        | 46.000   | .000 | 1.000 <sup>c</sup> |
| Lifetime                        | 1.000 | 365920.119 <sup>b</sup>  | 27.000        | 46.000   | .000 | 1.000 <sup>c</sup> |
| Lost sales                      | 1.000 | 135578.830 <sup>b</sup>  | 27.000        | 46.000   | .000 | 1.000 <sup>c</sup> |

a. Design: Demand \* Lifetime \* Lost sales

b. Exact statistic

c. Partial  $\eta^2$ : Large effect size

Table S4: Univariate results – Interaction of three independent variables

| Tests of Between-Subjects Effects |    |          |      |                  |             |
|-----------------------------------|----|----------|------|------------------|-------------|
| Dependent variable <sup>1</sup>   | df | F        | Sig. | Partial $\eta^2$ | Effect size |
| AI1-1                             | 1  | 29.038   | .000 | .287             | small       |
| AI1-2                             | 1  | 17.647   | .000 | .197             | negligible  |
| AI1-3                             | 1  | 37.068   | .000 | .340             | small       |
| AI2-1                             | 1  | 44.520   | .000 | .382             | small       |
| AI2-2                             | 1  | 23.586   | .000 | .247             | small       |
| AI2-3                             | 1  | 11.089   | .001 | .133             | negligible  |
| AI3-1                             | 1  | 2232.744 | .000 | .969             | large       |
| AI3-2                             | 1  | 2098.244 | .000 | .967             | large       |
| AI3-3                             | 1  | 2562.790 | .000 | .973             | large       |

|       |   |           |      |      |            |
|-------|---|-----------|------|------|------------|
| FR1-1 | 1 | 110.935   | .000 | .606 | medium     |
| FR1-2 | 1 | 100.822   | .000 | .583 | medium     |
| FR1-3 | 1 | 61.649    | .000 | .461 | small      |
| FR2-1 | 1 | 106.324   | .000 | .596 | medium     |
| FR2-2 | 1 | 54.396    | .000 | .430 | small      |
| FR2-3 | 1 | 85.548    | .000 | .543 | medium     |
| FR3-1 | 1 | 14.999    | .000 | .172 | negligible |
| FR3-2 | 1 | 49.139    | .000 | .406 | small      |
| FR3-3 | 1 | 28.466    | .000 | .283 | small      |
| OR1-1 | 1 | 65.007    | .000 | .474 | small      |
| OR1-2 | 1 | 26.520    | .000 | .269 | small      |
| OR1-3 | 1 | 43.946    | .000 | .379 | small      |
| OR2-1 | 1 | 29.768    | .000 | .293 | small      |
| OR2-2 | 1 | 38.149    | .000 | .346 | small      |
| OR2-3 | 1 | 12.387    | .001 | .147 | negligible |
| OR3-1 | 1 | 12307.759 | .000 | .994 | large      |
| OR3-2 | 1 | 8314.796  | .000 | .991 | large      |
| OR3-3 | 1 | 11477.748 | .000 | .994 | large      |

AI1-1 means Average Inventory at Retailer 1, product 1, and so on. Retailer 3 means Supplier.

Table S5: Univariate results – Interaction of product lifetime and lost sales probability  
Tests of Between-Subjects Effects

| Dependent variable <sup>1</sup> | df | F         | Sig. | Partial $\eta^2$ | Effect size |
|---------------------------------|----|-----------|------|------------------|-------------|
| AI1-1                           | 1  | 31.324    | .000 | .303             | small       |
| AI1-2                           | 1  | 44.353    | .000 | .381             | small       |
| AI1-3                           | 1  | 18.490    | .000 | .204             | small       |
| AI2-1                           | 1  | 44.159    | .000 | .380             | small       |
| AI2-2                           | 1  | 24.959    | .000 | .257             | small       |
| AI2-3                           | 1  | 44.193    | .000 | .380             | small       |
| AI3-1                           | 1  | 3696.243  | .000 | .981             | large       |
| AI3-2                           | 1  | 3518.565  | .000 | .980             | large       |
| AI3-3                           | 1  | 4191.648  | .000 | .983             | large       |
| FR1-1                           | 1  | 132.005   | .000 | .647             | medium      |
| FR1-2                           | 1  | 113.941   | .000 | .613             | medium      |
| FR1-3                           | 1  | 110.727   | .000 | .606             | medium      |
| FR2-1                           | 1  | 101.850   | .000 | .586             | medium      |
| FR2-2                           | 1  | 85.774    | .000 | .544             | medium      |
| FR2-3                           | 1  | 101.723   | .000 | .586             | medium      |
| FR3-1                           | 1  | 15650.109 | .000 | .995             | large       |
| FR3-2                           | 1  | 16887.078 | .000 | .996             | large       |
| FR3-3                           | 1  | 16795.416 | .000 | .996             | large       |
| OR1-1                           | 1  | 63.279    | .000 | .468             | small       |
| OR1-2                           | 1  | 99.063    | .000 | .579             | medium      |
| OR1-3                           | 1  | 84.262    | .000 | .539             | medium      |
| OR2-1                           | 1  | 86.421    | .000 | .546             | medium      |
| OR2-2                           | 1  | 82.257    | .000 | .533             | medium      |
| OR2-3                           | 1  | 41.708    | .000 | .367             | small       |
| OR3-1                           | 1  | 2967.121  | .000 | .976             | large       |

|       |   |          |      |      |       |
|-------|---|----------|------|------|-------|
| OR3-2 | 1 | 1953.215 | .000 | .964 | large |
| OR3-3 | 1 | 2649.886 | .000 | .974 | large |

AI1-1 means Average Inventory at Retailer 1, product 1, and so on. Retailer 3 means Supplier.

Table S6: Univariate results – Interaction of consumer demand and lost sales probability  
Tests of Between-Subjects Effects

| Dependent variable <sup>1</sup> | df | F          | Sig. | Partial $\eta^2$ | Effect size |
|---------------------------------|----|------------|------|------------------|-------------|
| AI1-1                           | 1  | 71.822     | .000 | .499             | small       |
| AI1-2                           | 1  | 84.468     | .000 | .540             | medium      |
| AI1-3                           | 1  | 83.944     | .000 | .538             | medium      |
| AI2-1                           | 1  | 96.382     | .000 | .572             | medium      |
| AI2-2                           | 1  | 66.466     | .000 | .480             | small       |
| AI2-3                           | 1  | 73.879     | .000 | .506             | medium      |
| AI3-1                           | 1  | 2219.389   | .000 | .969             | large       |
| AI3-2                           | 1  | 2360.941   | .000 | .970             | large       |
| AI3-3                           | 1  | 2785.510   | .000 | .975             | large       |
| FR1-1                           | 1  | 304.085    | .000 | .809             | large       |
| FR1-2                           | 1  | 223.965    | .000 | .757             | medium      |
| FR1-3                           | 1  | 238.717    | .000 | .768             | medium      |
| FR2-1                           | 1  | 250.035    | .000 | .776             | medium      |
| FR2-2                           | 1  | 193.495    | .000 | .729             | medium      |
| FR2-3                           | 1  | 234.548    | .000 | .765             | medium      |
| FR3-1                           | 1  | 388241.676 | .000 | 1.000            | large       |
| FR3-2                           | 1  | 416345.849 | .000 | 1.000            | large       |
| FR3-3                           | 1  | 417326.814 | .000 | 1.000            | large       |
| OR1-1                           | 1  | 212.855    | .000 | .747             | medium      |
| OR1-2                           | 1  | 196.810    | .000 | .732             | medium      |
| OR1-3                           | 1  | 166.773    | .000 | .698             | medium      |
| OR2-1                           | 1  | 138.069    | .000 | .657             | medium      |
| OR2-2                           | 1  | 122.297    | .000 | .629             | medium      |
| OR2-3                           | 1  | 79.910     | .000 | .526             | medium      |
| OR3-1                           | 1  | 18028.499  | .000 | .996             | large       |
| OR3-2                           | 1  | 12027.632  | .000 | .994             | large       |
| OR3-3                           | 1  | 16342.886  | .000 | .996             | large       |

AI1-1 means Average Inventory at Retailer 1, product 1, and so on. Retailer 3 means Supplier.

Table S7: Univariate results – Interaction of consumer demand and product lifetime  
Tests of Between-Subjects Effects

| Dependent variable <sup>1</sup> | df | F         | Sig. | Partial $\eta^2$ | Effect size |
|---------------------------------|----|-----------|------|------------------|-------------|
| AI1-1                           | 1  | 66295.566 | .000 | .999             | large       |
| AI1-2                           | 1  | 61030.325 | .000 | .999             | large       |
| AI1-3                           | 1  | 67188.704 | .000 | .999             | large       |
| AI2-1                           | 1  | 79541.411 | .000 | .999             | large       |
| AI2-2                           | 1  | 54011.667 | .000 | .999             | large       |
| AI2-3                           | 1  | 67028.477 | .000 | .999             | large       |
| AI3-1                           | 1  | 65114.087 | .000 | .999             | large       |

|       |   |            |      |       |       |
|-------|---|------------|------|-------|-------|
| AI3-2 | 1 | 64223.872  | .000 | .999  | large |
| AI3-3 | 1 | 75085.680  | .000 | .999  | large |
| FR1-1 | 1 | 22840.964  | .000 | .997  | large |
| FR1-2 | 1 | 24649.503  | .000 | .997  | large |
| FR1-3 | 1 | 23878.378  | .000 | .997  | large |
| FR2-1 | 1 | 23166.074  | .000 | .997  | large |
| FR2-2 | 1 | 19595.598  | .000 | .996  | large |
| FR2-3 | 1 | 18432.567  | .000 | .996  | large |
| FR3-1 | 1 | 54882.205  | .000 | .999  | large |
| FR3-2 | 1 | 58381.155  | .000 | .999  | large |
| FR3-3 | 1 | 58135.097  | .000 | .999  | large |
| OR1-1 | 1 | 75693.576  | .000 | .999  | large |
| OR1-2 | 1 | 75992.575  | .000 | .999  | large |
| OR1-3 | 1 | 75440.788  | .000 | .999  | large |
| OR2-1 | 1 | 61759.294  | .000 | .999  | large |
| OR2-2 | 1 | 72611.120  | .000 | .999  | large |
| OR2-3 | 1 | 37836.188  | .000 | .998  | large |
| OR3-1 | 1 | 274522.408 | .000 | 1.000 | large |
| OR3-2 | 1 | 182568.425 | .000 | 1.000 | large |
| OR3-3 | 1 | 247546.636 | .000 | 1.000 | large |

AI1-1 means Average Inventory at Retailer 1, product 1, and so on. Retailer 3 means Supplier.

Table S8: Univariate results – Main effects of consumer demand  
Tests of Between-Subjects Effects

| Dependent variable <sup>1</sup> | df | F           | Sig. | Partial $\eta^2$ | Effect size |
|---------------------------------|----|-------------|------|------------------|-------------|
| AI1-1                           | 1  | 792821.898  | .000 | 1.000            | large       |
| AI1-2                           | 1  | 743725.940  | .000 | 1.000            | large       |
| AI1-3                           | 1  | 814052.291  | .000 | 1.000            | large       |
| AI2-1                           | 1  | 958870.473  | .000 | 1.000            | large       |
| AI2-2                           | 1  | 659459.124  | .000 | 1.000            | large       |
| AI2-3                           | 1  | 822382.660  | .000 | 1.000            | large       |
| AI3-1                           | 1  | 1567213.085 | .000 | 1.000            | large       |
| AI3-2                           | 1  | 1527095.278 | .000 | 1.000            | large       |
| AI3-3                           | 1  | 1817039.330 | .000 | 1.000            | large       |
| FR1-1                           | 1  | 278787.369  | .000 | 1.000            | large       |
| FR1-2                           | 1  | 293331.239  | .000 | 1.000            | large       |
| FR1-3                           | 1  | 287808.564  | .000 | 1.000            | large       |
| FR2-1                           | 1  | 284659.200  | .000 | 1.000            | large       |
| FR2-2                           | 1  | 230050.186  | .000 | 1.000            | large       |
| FR2-3                           | 1  | 221653.781  | .000 | 1.000            | large       |
| FR3-1                           | 1  | 5777185.718 | .000 | 1.000            | large       |
| FR3-2                           | 1  | 6172582.746 | .000 | 1.000            | large       |
| FR3-3                           | 1  | 6177244.413 | .000 | 1.000            | large       |
| OR1-1                           | 1  | 1615851.798 | .000 | 1.000            | large       |
| OR1-2                           | 1  | 1606176.810 | .000 | 1.000            | large       |
| OR1-3                           | 1  | 1594596.971 | .000 | 1.000            | large       |
| OR2-1                           | 1  | 1314812.064 | .000 | 1.000            | large       |
| OR2-2                           | 1  | 1565875.786 | .000 | 1.000            | large       |

|       |   |              |      |       |       |
|-------|---|--------------|------|-------|-------|
| OR2-3 | 1 | 807719.873   | .000 | 1.000 | large |
| OR3-1 | 1 | 11100809.123 | .000 | 1.000 | large |
| OR3-2 | 1 | 7407673.533  | .000 | 1.000 | large |
| OR3-3 | 1 | 10011275.540 | .000 | 1.000 | large |

AI1-1 means Average Inventory at Retailer 1, product 1, and so on. Retailer 3 means Supplier.

Table S9: Univariate results – Main effects of product lifetime  
Tests of Between-Subjects Effects

| Dependent variable <sup>1</sup> | df | F           | Sig. | Partial $\eta^2$ | Effect size |
|---------------------------------|----|-------------|------|------------------|-------------|
| AI1-1                           | 1  | 1160483.794 | .000 | 1.000            | large       |
| AI1-2                           | 1  | 1094917.174 | .000 | 1.000            | large       |
| AI1-3                           | 1  | 1196644.547 | .000 | 1.000            | large       |
| AI2-1                           | 1  | 1406518.147 | .000 | 1.000            | large       |
| AI2-2                           | 1  | 970104.740  | .000 | 1.000            | large       |
| AI2-3                           | 1  | 1203156.149 | .000 | 1.000            | large       |
| AI3-1                           | 1  | 71551.923   | .000 | .999             | large       |
| AI3-2                           | 1  | 70530.914   | .000 | .999             | large       |
| AI3-3                           | 1  | 82309.651   | .000 | .999             | large       |
| FR1-1                           | 1  | 111207.196  | .000 | .999             | large       |
| FR1-2                           | 1  | 120534.764  | .000 | .999             | large       |
| FR1-3                           | 1  | 117598.009  | .000 | .999             | large       |
| FR2-1                           | 1  | 114871.095  | .000 | .999             | large       |
| FR2-2                           | 1  | 95397.932   | .000 | .999             | large       |
| FR2-3                           | 1  | 91110.889   | .000 | .999             | large       |
| FR3-1                           | 1  | 1219508.132 | .000 | 1.000            | large       |
| FR3-2                           | 1  | 1306659.534 | .000 | 1.000            | large       |
| FR3-3                           | 1  | 1306673.397 | .000 | 1.000            | large       |
| OR1-1                           | 1  | 156378.342  | .000 | 1.000            | large       |
| OR1-2                           | 1  | 156277.188  | .000 | 1.000            | large       |
| OR1-3                           | 1  | 155417.900  | .000 | 1.000            | large       |
| OR2-1                           | 1  | 126986.890  | .000 | .999             | large       |
| OR2-2                           | 1  | 150287.352  | .000 | 1.000            | large       |
| OR2-3                           | 1  | 78588.197   | .000 | .999             | large       |
| OR3-1                           | 1  | 635819.423  | .000 | 1.000            | large       |
| OR3-2                           | 1  | 424789.412  | .000 | 1.000            | large       |
| OR3-3                           | 1  | 574228.433  | .000 | 1.000            | large       |

AI1-1 means Average Inventory at Retailer 1, product 1, and so on. Retailer 3 means Supplier.

Table S10: Univariate results – Main effects of lost sales probability  
Tests of Between-Subjects Effects

| Dependent variable <sup>1</sup> | df | F       | Sig. | Partial $\eta^2$ | Effect size |
|---------------------------------|----|---------|------|------------------|-------------|
| AI1-1                           | 1  | 125.793 | .000 | .636             | medium      |
| AI1-2                           | 1  | 109.784 | .000 | .604             | medium      |
| AI1-3                           | 1  | 120.850 | .000 | .627             | medium      |
| AI2-1                           | 1  | 167.122 | .000 | .699             | medium      |
| AI2-2                           | 1  | 83.731  | .000 | .538             | medium      |

|       |   |            |      |       |        |
|-------|---|------------|------|-------|--------|
| AI2-3 | 1 | 93.652     | .000 | .565  | medium |
| AI3-1 | 1 | 9879.349   | .000 | .993  | large  |
| AI3-2 | 1 | 10120.507  | .000 | .993  | large  |
| AI3-3 | 1 | 11819.755  | .000 | .994  | large  |
| FR1-1 | 1 | 344.696    | .000 | .827  | large  |
| FR1-2 | 1 | 206.104    | .000 | .741  | medium |
| FR1-3 | 1 | 273.630    | .000 | .792  | medium |
| FR2-1 | 1 | 269.033    | .000 | .789  | medium |
| FR2-2 | 1 | 218.248    | .000 | .752  | medium |
| FR2-3 | 1 | 237.239    | .000 | .767  | medium |
| FR3-1 | 1 | 664051.361 | .000 | 1.000 | large  |
| FR3-2 | 1 | 709602.007 | .000 | 1.000 | large  |
| FR3-3 | 1 | 710005.749 | .000 | 1.000 | large  |
| OR1-1 | 1 | 266.181    | .000 | .787  | medium |
| OR1-2 | 1 | 310.304    | .000 | .812  | large  |
| OR1-3 | 1 | 322.789    | .000 | .818  | large  |
| OR2-1 | 1 | 250.024    | .000 | .776  | medium |
| OR2-2 | 1 | 367.317    | .000 | .836  | large  |
| OR2-3 | 1 | 153.082    | .000 | .680  | medium |
| OR3-1 | 1 | 198866.684 | .000 | 1.000 | large  |
| OR3-2 | 1 | 133285.617 | .000 | .999  | large  |
| OR3-3 | 1 | 179015.700 | .000 | 1.000 | large  |

---

AI1-1 means Average Inventory at Retailer 1, product 1, and so on. Retailer 3 means Supplier.
